# Supplementary material for: CAF Proteins Help SOT1 Regulate the Stability of Chloroplast ndhA Transcripts
Source: MDPI journal article supplement (doi:10.3390/ijms222312639), 2021-11-23
Supplement: s1 [file s1]

## CAF Proteins Help SOT1 Regulate the Stability of Chloroplast *ndhA* Transcripts

Xiuming Li <sup>1</sup>, Wenzhen Luo <sup>2</sup>, Wen Zhou <sup>3</sup>, Xiaopeng Yin <sup>2</sup>, Xuemei Wang <sup>4</sup>, Xiujin Li <sup>2</sup>, Chenchen Jiang <sup>2</sup>, Qingqing Zhang <sup>2</sup>, Xiaojing Kang <sup>2</sup>, Aihong Zhang <sup>2,\*</sup>, Yi Zhang <sup>2,\*</sup> and Congming Lu <sup>2</sup>

<sup>1</sup> State Key Laboratory of Crop Biology, College of Horticulture Science and Engineering, Shandong Agricultural University, Taian 271018, China; lixiuming@sdaa.edu.cn (X.L.)

<sup>2</sup> State Key Laboratory of Crop Biology, College of Life Sciences, Shandong Agricultural University, Taian 271018, China; wzluo1998@163.com (W.L.); xiaopengy@126.com (X.Y.); xjli1998@126.com (X.L.); cc\_jiang2019@163.com (C.J.); qingqingz2021@163.com (Q.Z.); kxj1201@163.com (X.K.); ahzhang@sdaa.edu.cn (A.Z.); zhangyi@sdaa.edu.cn (Y.Z.); cmlu@sdaa.edu.cn (C.L.)

<sup>3</sup> School of Life Science, Department of Biology, Southern University of Science and Technology, Shenzhen 518055, China; zhouw@sustech.edu.cn

<sup>4</sup> Shandong Provincial Key Laboratory of Plant Stress, College of Life Sciences, Shandong Normal University, Jinan 250014, China, wangxuemei2020@sdsu.edu.cn

\* Correspondence: ahzhang@sdaa.edu.cn (A.Z.); zhangyi@sdaa.edu.cn (Y.Z.)

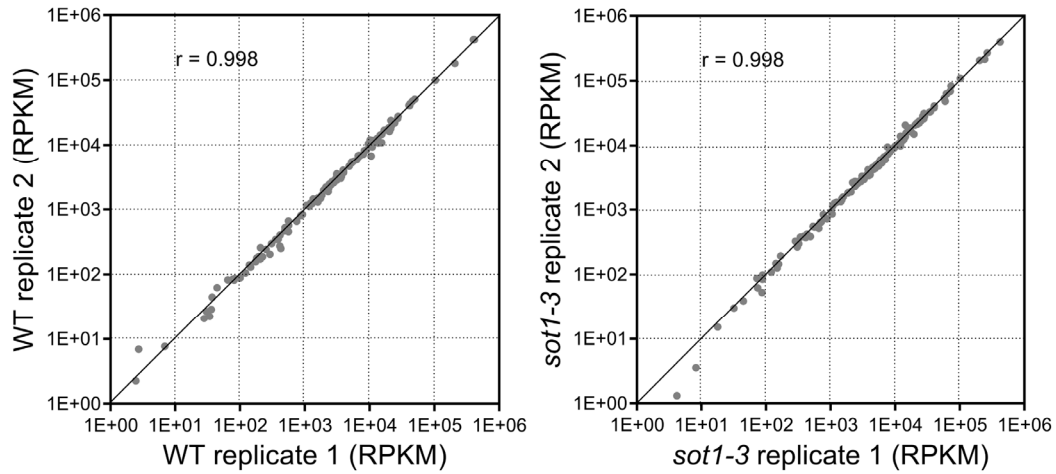

**Supplementary Figure S1.** Reproducibility of gene expression levels between the wild type (WT) and *sot1-3* replicates. Total RNA was isolated from 12-day-old WT and *sot1-3* seedlings and used for strand-specific RNA sequencing. The differential expression of each replicate was compared using the average number of reads per kilobase of transcript per million mapped reads (RPKM) values of total mapped reads from the chloroplast ( $n = 2$ ). Genes in the large inverted repeat of the chloroplast genome were included only once.

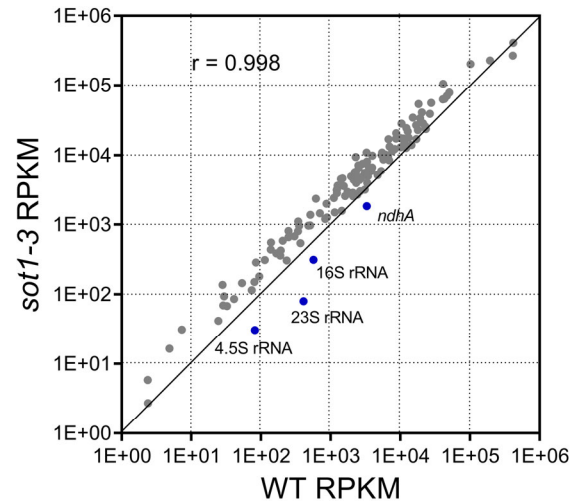

**Supplementary Figure S2.** Differential expression of chloroplast genes between the WT and *sot1-3* seedlings. Total RNA was isolated from 12-day-old WT and *sot1-3* seedlings and used for strand-specific RNA sequencing. The differential expression of chloroplast genes was compared between the WT and *sot1-3* using the average number of reads per kilobase of transcript per million mapped reads (RPKM) values ( $n = 2$ ). Genes in the large inverted repeat of the chloroplast genome were included only once. The genes with a decreased expression in the *sot1-3* seedlings relative to the WT are highlighted in blue.

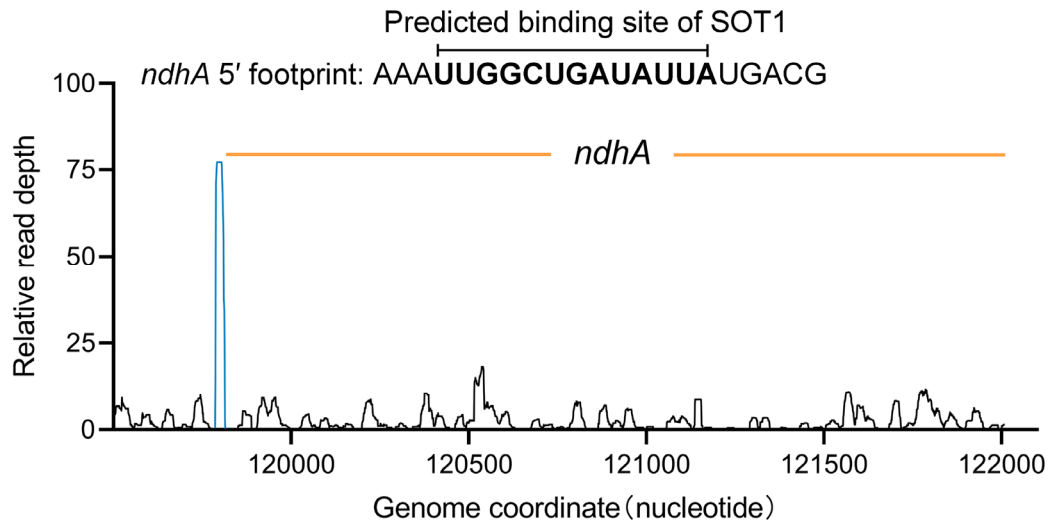

**Supplementary Figure S3.** Read coverage over *ndhA* regions for wild-type plants. Reads derived from small RNA sequencing were mapped to the Arabidopsis chloroplast genome. The graph indicates the read depth at each nucleotide of the *ndhA* region, normalized against the total number of reads for each sample. The RNA 'footprint' that matches the 5'-end upstream sequence of *ndhA* is highlighted in blue.

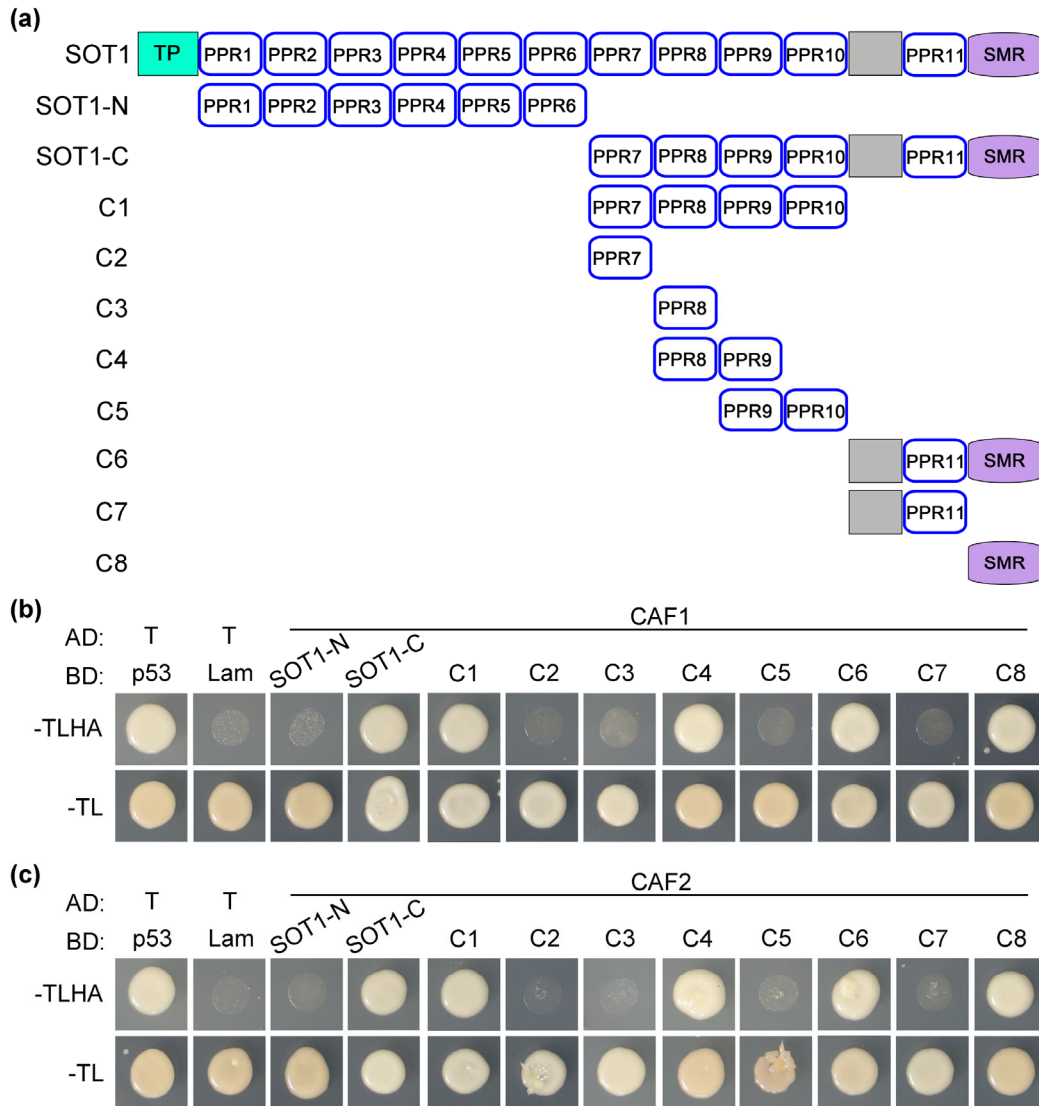

**Supplementary Figure S4.** Identification of the SOT1 domains that interact with CAF proteins. **(a)** Diagram the domain structures of SOT1 and various SOT1 deletions (SOT1-N, SOT1-C, and C1–C8). The turquoise and blue boxes indicate the chloroplast transit peptide (TP) and the single PPR motif (PPR1–11), respectively. The SMR domain is highlighted in purple. **(b)** and **(c)** Identification of the SOT1 domains that interact with **(b)** CAF1 and **(c)** CAF2 using a yeast two-hybrid assay. CAF1 and CAF2 were fused to the prey construct (AD); SOT1 and various SOT1 deletions were fused to the bait construct (BD). The ability to grow on -TLHA dropout plates indicates an interaction between the two proteins. The assay of interaction between SV40 large T-antigen (T) and murine p53 was used as a positive control; the interaction between SV40 large T-antigen (T) and lamin (Lam) was used as a negative control. -TL and -TLHA indicate SD/-Trp-Leu and SD/-Trp-Leu-His-Ade dropout plates, respectively.

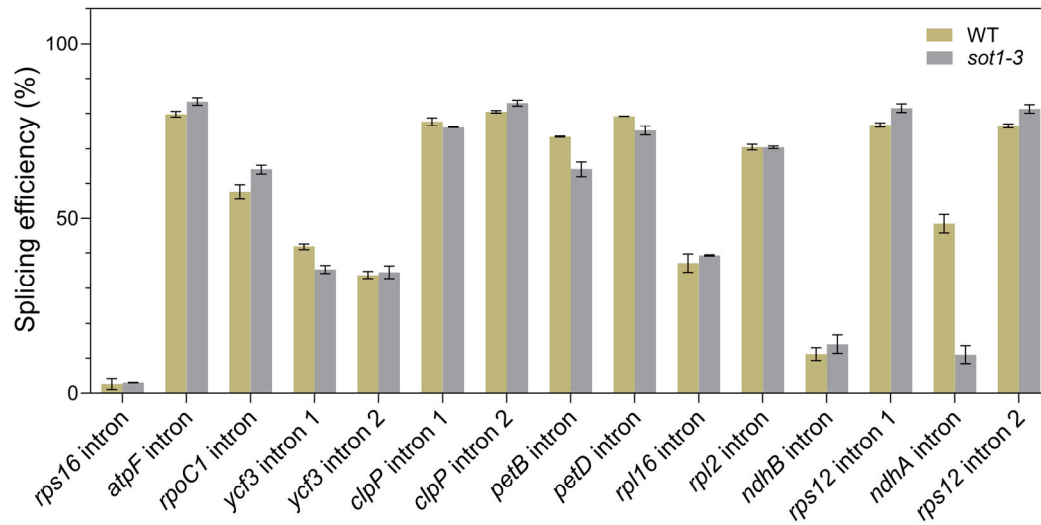

**Supplementary Figure S5.** RNA-sequencing (RNA-seq) determination of the RNA splicing efficiencies of chloroplast introns in 12-day-old WT and *sot1-3* seedlings. The splicing efficiency was determined according to Hotto et al. (2015). The splicing efficiency presented is the average of two replicates for both WT and *sot1-3* samples. Since the mature tRNA was discarded in the RNA-seq library preparation, the splicing efficiencies of tRNA introns was omitted. The values represent means  $\pm$  SD ( $n = 2$ ).

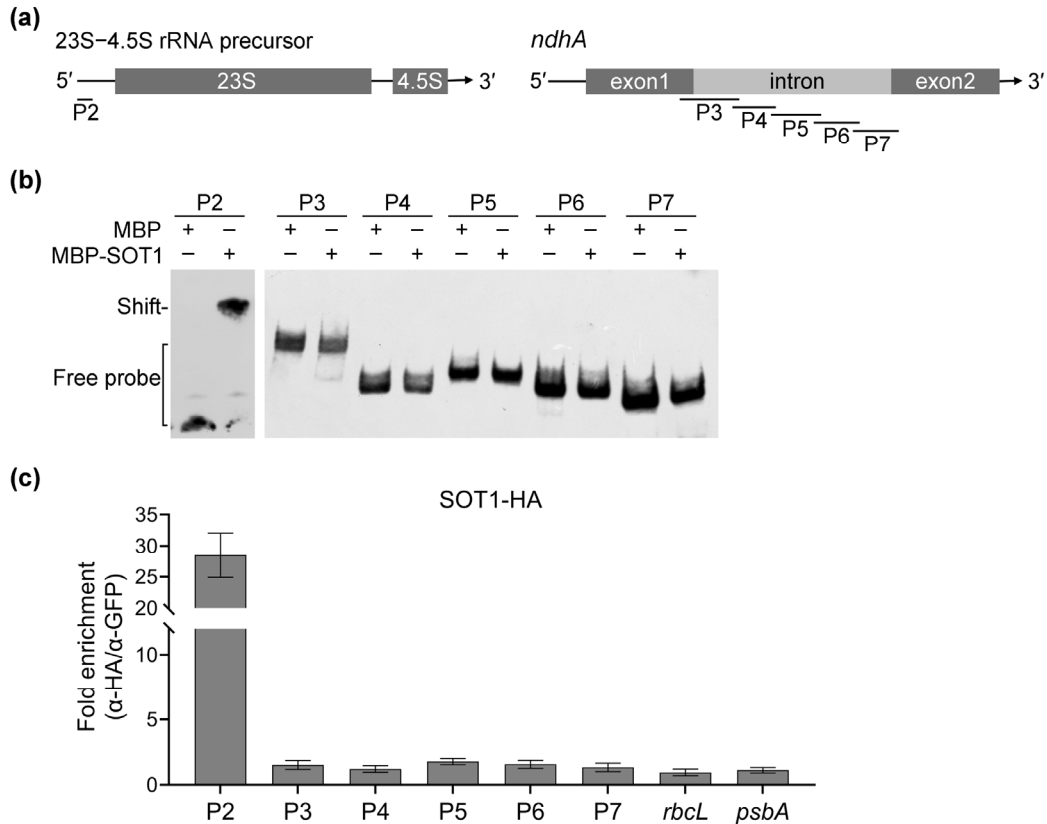

**Supplementary Figure S6.** SOT1 does not bind the intron of *ndhA* transcripts. **(a)** Schematic representation of the domain structures of the *ndhA* mRNA and the 23S-4.5S rRNA precursor. The positions of probes P2 to P7, subjected to RNA coimmunoprecipitation assays and electrophoretic mobility shift assay (EMSA), are shown below the models. **(b)** EMSA showing that SOT1 alone exhibits little binding activity to the *ndhA* intron. A total of 150 nM recombinant MBP and MBP-SOT1 proteins were incubated with 10 nM biotin-labeled probes. Three independent experiments were performed, and one representative experiment is shown. **(c)** RNA coimmunoprecipitation assays showing that SOT1 does not bind the *ndhA* intron in vivo. Intact chloroplasts were isolated from 12-day-old complemented *sot1-3/35S:SOT1-HA* plants (*sot1-3/35S:SOT1-HA*). The chloroplast extracts were subjected to immunoprecipitation against HA and GFP antibodies. SOT1 was reported to bind the 5' ends of the 23S-4.5S rRNA precursor (Wu et al., 2016; Zhou et al., 2017); therefore, this interaction served as a positive control. The sample immunoprecipitated using the GFP antibody served as a negative control. The relative RNA enrichment levels were determined using qPCR. Mean values ± SD of the triplicate replicates are shown.

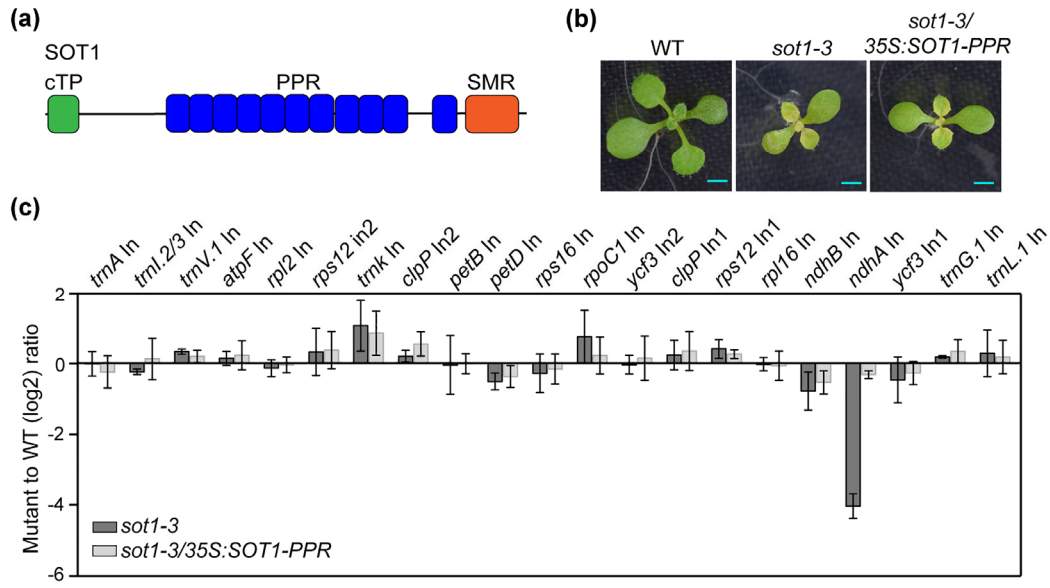

**Supplementary Figure S7.** The defective *ndhA* splicing in the *sot1-3* mutant was recovered in 12-day-old PPR-domain-complemented plants. **(a)** Schematic diagram of the SOT1 protein. The green and blue boxes represent the chloroplast transit peptide (TP) and each PPR motif, respectively. The SMR domain is highlighted in orange. **(b)** Phenotypes of WT, *sot1-3*, and its PPR-domain-complemented (*sot1-3/35S:SOT1-PPR*) plants grown for 12 days. **(c)** qPCR analysis of the splicing efficiency of chloroplast introns in the *sot1-3* and *sot1-3/35S:SOT1-PPR* complemented plants. The values represent the differences in the ratios of spliced to unspliced transcripts in 12-day-old *sot1-3* and *sot1-3/35S:SOT1-PPR* seedlings compared with those of the WT. Four biological replicates were analyzed. Error bars indicate SD.



**Supplementary Table S1.** RNA-seq alignment summary for two WT and *sot1-3* samples.

| Sample             | Mappable reads <sup>a</sup> | Mapped reads <sup>b</sup> | Mapped/Mappable (%) |
|--------------------|-----------------------------|---------------------------|---------------------|
| WT rep1            | 47,045,476                  | 22,527,949                | 47.89               |
| WT rep2            | 52,133,521                  | 23,977,993                | 45.99               |
| <i>sot1-3</i> rep1 | 51,145,460                  | 26,044,674                | 50.92               |
| <i>sot1-3</i> rep2 | 47,618,661                  | 22,350,101                | 46.94               |

<sup>a</sup>Mappable reads were selected after quality control, and therefore had a minimum length of 60 and a quality score higher than 30.

<sup>b</sup>Mapped reads represent the mappable reads that could be aligned to the Arabidopsis chloroplast genome (TAIR10) using TopHat2.

**Supplementary Table S2.** List of primers and oligonucleotides used in this study.

| Purpose          | Primer name           | Primer sequence (5'-3')  |
|------------------|-----------------------|--------------------------|
| Quantitative PCR | <i>trnH</i> -forward  | GCGGATGTAGCCAAGTGGAT     |
|                  | <i>trnH</i> -reverse  | GGCGAACGACGGAATTGAA      |
|                  | <i>psbA</i> -forward  | GGTCGCTTCTGTAAGTGGAT     |
|                  | <i>psbA</i> -reverse  | GTTGCGGTCAATAAGGTAGG     |
|                  | <i>ndhK</i> -forward  | GCCTATGGCCGCTTCTTTAT     |
|                  | <i>ndhK</i> -reverse  | GTCTAGGACTCGATCTTGGTACT  |
|                  | <i>rps16</i> -forward | ATTGATGTTTCGATCCCGAAGAG  |
|                  | <i>rps16</i> -reverse | TCTTGTTGGTTGAGCTCCTTT    |
|                  | <i>trnQ</i> -forward  | TGGGGCGTAGCCAAGCGGTA     |
|                  | <i>trnQ</i> -reverse  | CTGGGACGGAAGGATTCGAA     |
|                  | <i>trnG</i> -forward  | TGGCGGAAATAGCTTAATGG     |
|                  | <i>trnG</i> -reverse  | AGCGGAAGGAGGGACTTGAA     |
|                  | <i>trnR</i> -forward  | GCGTCCATTGTCTAATGGAT     |
|                  | <i>trnR</i> -reverse  | TGCGTCCAATAGGATTTGAA     |
|                  | <i>trnS</i> -forward  | GGAGAGATGGCTGAGTGGAC     |
|                  | <i>trnS</i> -reverse  | GGGAAAGAGAGGGATTTCGAA    |
|                  | <i>atpA</i> -forward  | TATTATTTTCGAGACGTTCTG    |
|                  | <i>atpA</i> -reverse  | ATTGTATCTGTGGCTACTGC     |
|                  | <i>atpF</i> -forward  | CGATTCTTTCGTTTACTTGG     |
|                  | <i>atpF</i> -reverse  | TCATTTAACACTCCCTTTCC     |
|                  | <i>atpH</i> -forward  | CACTGGTTTCTGCTGCTTCG     |
|                  | <i>atpH</i> -reverse  | TTCTGCCTCAGGTTGTCTCG     |
|                  | <i>atpI</i> -forward  | CCTTTATTGGAACCTGTTT      |
|                  | <i>atpI</i> -reverse  | ATCATTTCGTTGGTGTCTGCTA   |
|                  | <i>rps2</i> -forward  | GGGCTCGGTGTCATTATGTT     |
|                  | <i>rps2</i> -reverse  | ACGGTTGAATCCCTCTGTCT     |
|                  | <i>rpoB</i> -forward  | TTGATGTGAGGTGGGTTTCAG    |
|                  | <i>rpoB</i> -reverse  | GCATATCCTGTCTAGGCAAA     |
|                  | <i>rpoC1</i> -forward | GAGTTGAGACCCATCATTCA     |
|                  | <i>rpoC1</i> -reverse | GTATCCACGGCTTCTTGAC      |
|                  | <i>rpoC2</i> -forward | CCACTCATGGTGACCTCGTT     |
|                  | <i>rpoC2</i> -reverse | TTCGGCAGTACCTCCTGTAA     |
|                  | <i>trnC</i> -forward  | GGCGGCATGGCCGAGTGGTA     |
|                  | <i>trnC</i> -reverse  | AGGCGGCACCCGGATTGAA      |
|                  | <i>ycf6</i> -forward  | ATGGATATAGTAAGTCTCGCAT   |
|                  | <i>ycf6</i> -reverse  | CTAGAGTCCACTTCTTCCC      |
|                  | <i>trnY</i> -forward  | GGGTCGATGCCCGAGCGGTT     |
|                  | <i>trnY</i> -reverse  | TGGGCCGAGCTGGATTGAAAC    |
|                  | <i>trnE</i> -forward  | GCCCCATCGTCTAGTGGTT      |
|                  | <i>trnE</i> -reverse  | TACCCCCAGGGGAAGTCGAA     |
|                  | <i>trnT</i> -forward  | GCCCTTTTAACTCAGTGGTA     |
|                  | <i>trnT</i> -reverse  | AGCCCCTTATCGGATTTGAA     |
|                  | <i>psbC</i> -forward  | ACTTCTGGGACCCGAAACTC     |
|                  | <i>psbC</i> -reverse  | AAAGGCACCTACACCTAACA     |
|                  | <i>psbD</i> -forward  | CAAGGGTTTCATAATTGGAC     |
|                  | <i>psbD</i> -reverse  | ATGTATTTGCACCATCACCA     |
|                  | <i>ycf9</i> -forward  | CTTACTGATTAGTGTACCCGTTGT |

|  |                       |                         |
|--|-----------------------|-------------------------|
|  | <i>ycf9</i> -reverse  | AGGATACCCACCAAGAAGACTA  |
|  | <i>rps14</i> -forward | CGCGTAATAGTGCACCTACA    |
|  | <i>rps14</i> -reverse | CGAAGGATGTGTCCAGATAGTC  |
|  | <i>psaA</i> -forward  | TGAGTTAGTAGCAGTGGGTG    |
|  | <i>psaA</i> -reverse  | CAACAGTATCAATACCGTCA    |
|  | <i>psaB</i> -forward  | ATTCGCTGGAAAGATAAACC    |
|  | <i>psaB</i> -reverse  | ATCAAGAAAGCCGCATAAGT    |
|  | <i>ycf3</i> -forward  | GATCTGTCATTACCGTGGAG    |
|  | <i>ycf3</i> -reverse  | TAAGCGTTATAGCCTGTTTC    |
|  | <i>rps4</i> -forward  | GCGTTTGGATAACATCCTTT    |
|  | <i>rps4</i> -reverse  | GTTTGCAGCGATAACTTGGT    |
|  | <i>trnL</i> -forward  | GGGGATATGGCGGAATTGGT    |
|  | <i>trnL</i> -reverse  | TGGGGATAGAGGGACTTGAAC   |
|  | <i>ndhJ</i> -forward  | TTACAAATAAAGCCCGAAGA    |
|  | <i>ndhJ</i> -reverse  | TGATACACGCTGGCTAAGAG    |
|  | <i>ndhC</i> -forward  | GTATCCGTGGGCAATGAGTT    |
|  | <i>ndhC</i> -reverse  | ACCATTCCAATGCTCCTTTT    |
|  | <i>trnV</i> -forward  | AGGGCTATAGCTCAGTTAGG    |
|  | <i>trnV</i> -reverse  | TAGGGCTATACGGACTCGAA    |
|  | <i>trnM</i> -forward  | ACCTACTTAAGTCAGTGGTT    |
|  | <i>trnM</i> -reverse  | TACCTACTATTGGATTGAA     |
|  | <i>atpE</i> -forward  | ATTGTTTGGGATTGAGAAGT    |
|  | <i>atpE</i> -reverse  | CCATTGGTTAGCAAGGCGTA    |
|  | <i>atpB</i> -forward  | TTGGTCTAGCGGAAACAATT    |
|  | <i>atpB</i> -reverse  | CCTTCGCAGTAGCTTCATCG    |
|  | <i>rbcL</i> -forward  | AAACTTGAAGGAGACAGGGAG   |
|  | <i>rbcL</i> -reverse  | CTGAAGCCACAGGCAGAACA    |
|  | <i>accD</i> -forward  | ATTATTGCCGAACCCTATGC    |
|  | <i>accD</i> -reverse  | TAAAGATTGAGCCGCTTGTG    |
|  | <i>ycf4</i> -forward  | ATATGGAAATTCGAGGTCAA    |
|  | <i>ycf4</i> -reverse  | GGTACACGCAAGAAGTAAGC    |
|  | <i>ycf10</i> -forward | TGGATTACTAATTGGTGGAA    |
|  | <i>ycf10</i> -reverse | GTAAATTGGTTTCTGGGTAT    |
|  | <i>petA</i> -forward  | TCGCTCCATATCTGTCTCAC    |
|  | <i>petA</i> -reverse  | ACATACAATACGCCCAGTCG    |
|  | <i>trnW</i> -forward  | ACGCTCTTAGTTCAGTTCGG    |
|  | <i>trnW</i> -reverse  | CACGCTCTGTAGGATTGAA     |
|  | <i>trnP</i> -forward  | AGGGATGTAGCGCAGCTTGG    |
|  | <i>trnP</i> -reverse  | TAGGGATGACAGGATTGAA     |
|  | <i>rpl33</i> -forward | GTTTCGAGTAACAATTATTTTGG |
|  | <i>rpl33</i> -reverse | TTATGCCGATTCTTTTGAGT    |
|  | <i>rps18</i> -forward | AATCCAAGCGATCTTTTCGT    |
|  | <i>rps18</i> -reverse | GTCACTCTATTACCCGTCT     |
|  | <i>rpl20</i> -forward | AGCTCGGAGGCGTAGAACAA    |
|  | <i>rpl20</i> -reverse | CCCGATGAGCCGAAACTAAA    |
|  | <i>rps12</i> -forward | ACGATTAACCTCGGGATTG     |
|  | <i>rps12</i> -reverse | GGTTCCTCGAACAATGTGAT    |
|  | <i>clpP</i> -forward  | CAAAGAACGGGCAAACCTAT    |
|  | <i>clpP</i> -reverse  | GAACCGCTACAAGATCAACA    |

|  |                         |                          |
|--|-------------------------|--------------------------|
|  | <i>psbB</i> -forward    | GTTGTGCTGGAACATATGTG     |
|  | <i>psbB</i> -reverse    | CTTGTTGAAAGTATCCCTGA     |
|  | <i>petB</i> -forward    | ATATGTTCCCTCCGCATGTCA    |
|  | <i>petB</i> -reverse    | ACGGTTGGACGGTAATAAAA     |
|  | <i>petD</i> -forward    | GCTAAAGGTATGGGTCACAA     |
|  | <i>petD</i> -reverse    | AAGCCTACGTTACAGGCAAT     |
|  | <i>rpoA</i> -forward    | ACTCGGACACTACAGTGGA      |
|  | <i>rpoA</i> -reverse    | AAGTAAAGCTCTTCGCATCG     |
|  | <i>rps11</i> -forward   | GGTCGGGTGATTTCTTGGTC     |
|  | <i>rps11</i> -reverse   | CAGCTCGTTGCATACCTTGATC   |
|  | <i>rpl36</i> -forward   | AAATAAGGGCTTCCGTTTCGT    |
|  | <i>rpl36</i> -reverse   | TTTGTTTATGCCTCGGGTTG     |
|  | <i>rps8</i> -forward    | CGACCGGTCTACGAATCTA      |
|  | <i>rps8</i> -reverse    | GCTTCTCGGTCTGTCATTATACC  |
|  | <i>rpl14</i> -forward   | TAGTAATCGCCGATATGCTC     |
|  | <i>rpl14</i> -reverse   | GTCCCATTTGTTACGTTTGAG    |
|  | <i>rpl16</i> -forward   | CGCAATGACACGAAATGTAC     |
|  | <i>rpl16</i> -reverse   | TCCTTTCCCAGAACCCATAC     |
|  | <i>rpl22</i> -forward   | TATGCCTTATCGAGGATGTT     |
|  | <i>rpl22</i> -reverse   | AGTATTCCTTGGTTCACCT      |
|  | <i>rps19</i> -forward   | AGAAATCATAATAACTTGGTCC   |
|  | <i>rps19</i> -reverse   | TATAAACGGGTAAGTGTTC      |
|  | <i>rpl2</i> -forward    | GCTGTAGCGAAACTGATTGC     |
|  | <i>rpl2</i> -reverse    | ACTTGTCCGACTGTTGCTGA     |
|  | <i>rpl23</i> -forward   | GGGTCGAACTCTTCTTTGGT     |
|  | <i>rpl23</i> -reverse   | AACCCGGTTGAAGCGTAATG     |
|  | <i>trnI</i> -forward    | GGGCTATTAGCTCAGTGGA      |
|  | <i>trnI</i> -reverse    | TGGGCCATCCTGGATTTGAA     |
|  | <i>ycf2</i> -forward    | ACCGATTCCCTAAATACCTT     |
|  | <i>ycf2</i> -reverse    | GAAATTCTTCGCTTTCTTC      |
|  | <i>orf77</i> -forward   | ATGCTACTACTGAAACATGGAAGA |
|  | <i>orf77</i> -reverse   | GTAGTGAGTAATAGCTCCGGTTG  |
|  | <i>ndhB</i> -forward    | CTCCCACTCCAGTCGTTGCT     |
|  | <i>ndhB</i> -reverse    | TCCAGAAGAAGATGCCATTC     |
|  | <i>rps7</i> -forward    | TAGGCGGGTCAACTCATCAA     |
|  | <i>rps7</i> -reverse    | CCTTTGGCAGCATCCACTAA     |
|  | <i>rrn16S</i> -forward  | CGCTAGTAATCGCCGGTCAG     |
|  | <i>rrn16S</i> -reverse  | CCTCCTTGCGGTTAAGGTAA     |
|  | <i>trnA</i> -forward    | GGGATATAGCTCAGTTGGT      |
|  | <i>trnA</i> -reverse    | TGGAGATAAGCGGACTCGAA     |
|  | <i>trnL</i> -forward    | GGGATATGGCGGAATTGGT      |
|  | <i>trnL</i> -reverse    | TGGGGATAGAGGGACTTGAAC    |
|  | <i>rrn23S</i> -forward  | TGGGCGTTAGAGCATTGAGA     |
|  | <i>rrn23S</i> -reverse  | GTTATCCGCTCCGCACTTGG     |
|  | <i>rrn4.5S</i> -forward | GAAGGTCACGGCGAGACGAGCC   |
|  | <i>rrn4.5S</i> -reverse | GTTCAAGTCTACCGGTCTGTT    |
|  | <i>rrn5S</i> -forward   | TCCTCAGTAGCTCAGTGGA      |
|  | <i>rrn5S</i> -reverse   | CTCCCAAGTAGGATTCGAA      |
|  | <i>trnN</i> -forward    | CGGTTATGGACGAAGGAGA      |

|                      |                                 |                            |
|----------------------|---------------------------------|----------------------------|
|                      | <i>trnN</i> -reverse            | CCAATGCTAAATGCAGAGGC       |
|                      | <i>ycf1</i> -forward            | TACTATGGTAGCGGCGGGTAT      |
|                      | <i>ycf1</i> -reverse            | TGAGCAAGAGCTAAAGTGGC       |
|                      | <i>ndhF</i> -forward            | AAAACGTACTTCTATCTCGA       |
|                      | <i>ndhF</i> -reverse            | TGTAGAAAGTGATTTCCCTA       |
|                      | <i>rpl32</i> -forward           | TCCCAGTGGTTAATGATGCA       |
|                      | <i>rpl32</i> -reverse           | CCGACTTTGCGAAATGTAAT       |
|                      | <i>ycf5</i> -forward            | TCCTCAGTAGCTCAGTGGTA       |
|                      | <i>ycf5</i> -reverse            | CTCCCCAAGTAGGATTTCGAA      |
|                      | <i>ndhD</i> -forward            | TTCTTCTAACGACCTACGCT       |
|                      | <i>ndhD</i> -reverse            | TCTATTCCCATTCTCCAGTA       |
|                      | <i>psaC</i> -forward            | CTTGTTTTGAGTGCCTATTT       |
|                      | <i>psaC</i> -reverse            | AACTGCATTGAGTATAAGTT       |
|                      | <i>ndhE</i> -forward            | GCTGCTGCACAACTCCTTAT       |
|                      | <i>ndhE</i> -reverse            | CAAACCAACGAAGTAATCCC       |
|                      | <i>ndhG</i> -forward            | CTGTAAC TATTCAATATCCCTA    |
|                      | <i>ndhG</i> -reverse            | GTTTCCAATTTCCAATCAAC       |
|                      | <i>ndhI</i> -forward            | TTTACCAGAAGCGGAAGAAG       |
|                      | <i>ndhI</i> -reverse            | CAACCGCCTAAGTATAGAAC       |
|                      | <i>ndhA</i> -forward            | TCGTATTGGAGGAATAGCGG       |
|                      | <i>ndhA</i> -reverse            | GGATTTCTGTGAATGAGTTT       |
|                      | <i>ndhH</i> -forward            | TTCACTAATAAGATACGAAGAC     |
|                      | <i>ndhH</i> -reverse            | TTTTGACAAATAAGCCAGCA       |
|                      | <i>rps15</i> -forward           | CTTGTTTTGAGTGCCTATTT       |
|                      | <i>rps15</i> -reverse           | AACTGCATTGAGTATAAGTT       |
| RNA gel blot         | probe a-forward                 | GGATCTTCGTAAAATTGATCG      |
|                      | probe a-reverse                 | ATCTATGCTACCGAGTATCGTC     |
|                      | probe b-forward                 | AAGTGAGCGGCAATTAGGTAA      |
|                      | probe b-reverse                 | CCCGAATTATACCAATGGAATTC    |
|                      | probe c-forward                 | GTACAGTTGATATAGTTGAGGC     |
|                      | probe c-reverse                 | AGATTACCAAGGGAAATAGG       |
|                      | probe d-forward                 | ATGCTTCCTATGATAACCGG       |
|                      | probe d-reverse                 | TCAAATTAAAGGGTTTACCCC      |
|                      | probe e-forward                 | ATGGATTTGCCTGGACCAA        |
|                      | probe e-reverse                 | GACGAGCCACAGAAATTGC        |
|                      | probe f-forward                 | ATGATACTCGAACATGTACTTGT    |
|                      | probe f-reverse                 | CTTATTTAATAAGGTCGATTGG     |
|                      | probe g-forward                 | GTCACATTCAGTAAAAATTTATG    |
|                      | probe g-reverse                 | TCAATAAGCTAGACCCATACT      |
|                      | probe h-forward                 | AGCAATGTACAGCGGTCAAA       |
|                      | probe h-reverse                 | ATTCGAACCAACCCATAGGC       |
| RACE                 | <i>ndhA</i> 5'                  | CCTGACATAAGAAGTCCAATAGGAGC |
| qRT-PCR for splicing | <i>trnA</i> (unspliced)-forward | GGGGATATAGCTCAGTTG         |
|                      | <i>trnA</i> (spliced)-reverse   | TGGAGATAAGCGGACTC          |
|                      | <i>trnA</i> (unspliced)-reverse | TAGAAAAAGTGAGCCACC         |
|                      | <i>trnI</i> (spliced)-forward   | GGGCTATTAGCTCAGTGGTAG      |
|                      | <i>trnI</i> (unspliced)-reverse | TGGGCCATCCTGGATTTG         |
|                      | <i>trnI</i> (unspliced)-forward | CGTTCGGGAAGGATGAATC        |
|                      | <i>trnV</i> (unspliced)-forward | AGGGCTATAGCTCAGTTAG        |

|                                    |                             |
|------------------------------------|-----------------------------|
| <i>trnV</i> (spliced)-reverse      | TAGGGCTATACGGACTC           |
| <i>trnV</i> (unspliced)-reverse    | GACATCGATTTCTTAATAAGATC     |
| <i>atpF</i> (spliced)-forward      | GCAACAAATCCAATAAATCTAAG     |
| <i>atpF</i> (unspliced)-reverse    | ATAGCTCCTTCACGCAG           |
| <i>atpF</i> (unspliced)-forward    | TTCGGGAAGGGATCATAG          |
| <i>rpl2</i> (spliced)-forward      | CAGAGGGGCTATAATTGGAG        |
| <i>rpl2</i> (unspliced)-reverse    | CGCTGCTCTAGCTAATTG          |
| <i>rpl2</i> (unspliced)-forward    | TGCTTTGGAAGAAGCTTG          |
| <i>rps12-2</i> (unspliced)-forward | CTGTAGTCTTAGTAAGAGGG        |
| <i>rps12-2</i> (spliced)-reverse   | TTATTTTGGCTTTTTGACCC        |
| <i>rps12-2</i> (unspliced)-reverse | CTTGATAAGAATCTACAACG        |
| <i>trnK</i> (unspliced)-forward    | GGGTTGCTAACTCAACG           |
| <i>trnK</i> (spliced)-reverse      | ACTCGAACCCGGAAGTAG          |
| <i>trnK</i> (unspliced)-reverse    | GTGGTCTTACAACTCTACC         |
| <i>clpP-2</i> (unspliced)-forward  | TTCAATAGCATCCTTTATCC        |
| <i>clpP-2</i> (spliced)-reverse    | AAGATAAATTCTCCCGTTG         |
| <i>clpP-2</i> (unspliced)-reverse  | CTAATTCATATTTCAAATGGCG      |
| <i>petB</i> (spliced)-forward      | CATTGTATATTTCCGGAATATGAG    |
| <i>petB</i> (unspliced)-reverse    | TATGTTGACATGCGGAGGAA        |
| <i>petB</i> (unspliced)-forward    | TCTTGAGGGGGAGTAACCT         |
| <i>petD</i> (spliced)-forward      | GAAGAGATAATGGATTATGGGAGTG   |
| <i>petD</i> (unspliced)-reverse    | GGGTTCCCCGTAATAATTGTG       |
| <i>petD</i> (unspliced)-forward    | AAAAATTATCATGTCCGGTTCC      |
| <i>rps16</i> (spliced)-forward     | ATGGTAAAACTTCGTTTAAAC       |
| <i>rps16</i> (unspliced)-reverse   | TAAGATCTCTTCCTTCTCTTCG      |
| <i>rps16</i> (unspliced)-forward   | CCGTACGAGGCCAAAAC           |
| <i>rpoC1</i> (spliced)-forward     | CGTCTTCCTAGTTATATTGC        |
| <i>rpoC1</i> (unspliced)-reverse   | ACCTCGTAATCGTAAGAAAG        |
| <i>rpoC1</i> (unspliced)-forward   | GGATGAGAGGAAACTTTCATG       |
| <i>ycf3-2</i> (spliced)-forward    | TTCGGGCATTAGAACGAAAC        |
| <i>ycf3-2</i> (unspliced)-reverse  | AATACTCAGCGGCTTGAG          |
| <i>ycf3-2</i> (unspliced)-forward  | TGAGGTAGGAACTCTCAAGTAC      |
| <i>clpP-1</i> (unspliced)-forward  | CCTATTGGCGTTCCAAAAG         |
| <i>clpP-1</i> (spliced)-reverse    | ATTCGAGATTTCCGGTATCAACC     |
| <i>clpP-1</i> (unspliced)-reverse  | TGGGGAAATCCCATATAGC         |
| <i>rps12-1</i> (unspliced)-forward | AGAAATACAAGACAGCCAATC       |
| <i>rps12-1</i> (spliced)-reverse   | TACGTAAAGCAGAGTTTGG         |
| <i>rps12-1</i> (unspliced)-reverse | TCAGTCTATGATCTAAACGAGTC     |
| <i>rpl16</i> (spliced)-forward     | TCCTTTGATATAATTGCTATGCTTAGT |
| <i>rpl16</i> (unspliced)-reverse   | CCAAATTTTTCCACCACGTC        |
| <i>rpl16</i> (unspliced)-forward   | GAAACTCTCACGTTCAATTCTGT     |
| <i>ndhB</i> (spliced)-forward      | TCATCAATGGACTCCTGACG        |
| <i>ndhB</i> (unspliced)-reverse    | CCAGAAGAAGATGCCATTCA        |
| <i>ndhB</i> (unspliced)-forward    | AGTCTCATGCACGGTTTTGA        |
| <i>ndhA</i> (spliced)-forward      | CTGCCCAATCGATTAGTTATG       |
| <i>ndhA</i> (spliced)-reverse      | GTTTTTGGGGATGGAATTTG        |
| <i>ndhA</i> (unspliced)-forward    | TGAGGCCAAGACCTCATG          |

|                     |                                   |                             |
|---------------------|-----------------------------------|-----------------------------|
|                     | <i>ycf3-1</i> (spliced)-forward   | CGAGTCATTCCGACAACCTTC       |
|                     | <i>ycf3-1</i> (unspliced)-reverse | TGTGGTAAAAAGGGGTTTCG        |
|                     | <i>ycf3-1</i> (unspliced)-forward | CCTAAAGGAGGAGCCGTATG        |
|                     | <i>trnG</i> (unspliced)-forward   | GCGGGTATAGTTTAGTGG          |
|                     | <i>trnG</i> (spliced)-reverse     | GGTAGCGGGAATCGAAC           |
|                     | <i>trnG</i> (unspliced)-reverse   | GGAAAGGACTAAATCCTTTTAAG     |
|                     | <i>trnL</i> (spliced)-forward     | GGGATATGGCGGAATTG           |
|                     | <i>trnL</i> (unspliced)-reverse   | TGGGGATAGAGGGACTTG          |
|                     | <i>trnL</i> (unspliced)-forward   | GATAGAGTCCCATTTTACATGTC     |
|                     |                                   |                             |
| RT-PCR for splicing | <i>trnA</i> -RT-forward           | GGGGATATAGCTCAGTTG          |
|                     | <i>trnA</i> -RT-reverse           | TGGAGATAAGCGGACTC           |
|                     | <i>trnI</i> -RT-forward           | GGGCTATTAGCTCAGTGGTAG       |
|                     | <i>trnI</i> -RT-reverse           | TGGGCCATCCTGGATTTG          |
|                     | <i>trnV</i> -RT-forward           | AGGGCTATAGCTCAGTTAG         |
|                     | <i>trnV</i> -RT-reverse           | TAGGGCTATACGGACTC           |
|                     | <i>atpF</i> -RT-forward           | GCAACAAATCCAATAAATCTAAG     |
|                     | <i>atpF</i> -RT-reverse           | ATAGCTCCTTCACGCAG           |
|                     | <i>rpl2</i> -RT-forward           | CAGAGGGGCTATAATTGGAG        |
|                     | <i>rpl2</i> -RT-reverse           | CGCTGCTCTAGCTAATTG          |
|                     | <i>rps12-2</i> -RT-forward        | CTGTAGTCTTAGTAAGAGGG        |
|                     | <i>rps12-2</i> -RT-reverse        | TTATTTTGGCTTTTIGACCC        |
|                     | <i>clpP-2</i> -RT-forward         | TTCAATAGCATCCTTTATCC        |
|                     | <i>clpP-2</i> -RT-reverse         | AAGATAAATTCTCCCGTTTG        |
|                     | <i>petB</i> -RT-forward           | CATTGTATATTTCCGGAATATGAG    |
|                     | <i>petB</i> -RT-reverse           | TATGTTGACATGCGGAGGAA        |
|                     | <i>petD</i> -RT-forward           | GAAGAGATAATGGATTATGGGAGTG   |
|                     | <i>petD</i> -RT-reverse           | GGGTTCCCCGTAATAATTGTG       |
|                     | <i>rps16</i> -RT-forward          | ATGGTAAAACTTCGTTTAAAAC      |
|                     | <i>rps16</i> -RT-reverse          | TAAGATCTCTTCCTTCTCTTCG      |
|                     | <i>rpoC1</i> -RT-forward          | CGTCTCCTAGTTATATTGC         |
|                     | <i>rpoC1</i> -RT-reverse          | ACCTCGTAATCGTAAGAAAG        |
|                     | <i>ycf3-2</i> -RT-forward         | TTCGGGCATTAGAACGAAAC        |
|                     | <i>ycf3-2</i> -RT-reverse         | AATACTCAGCGGCTTGAG          |
|                     | <i>clpP-1</i> -RT-forward         | CCTATTGGCGTTCCAAAAG         |
|                     | <i>clpP-1</i> -RT-reverse         | ATTGAGATTTCGGTATCAACC       |
|                     | <i>rps12-1</i> -RT-forward        | AGAAATACAAGACAGCCAATC       |
|                     | <i>rps12-1</i> -RT-reverse        | TACGTAAAGCAGAGTTTGG         |
|                     | <i>rpl16</i> -RT-forward          | TCCTTTGATATAATTGCTATGCTTAGT |
|                     | <i>rpl16</i> -RT-reverse          | CCAAATTTTTCCACCACGTC        |
|                     | <i>ndhB</i> -RT-forward           | TCATCAATGGACTCCTGACG        |
|                     | <i>ndhB</i> -RT-reverse           | CCAGAAGAAGATGCCATTCA        |
|                     | <i>ndhA</i> -RT-forward           | CTGCCCAATCGATTAGTTATG       |
|                     | <i>ndhA</i> -RT-reverse           | GTTTTTGGGGATGGAATTTG        |
|                     | <i>ycf3-1</i> -RT-forward         | CGAGTCATTCCGACAACCTTC       |
|                     | <i>ycf3-1</i> -RT-reverse         | TGTGGTAAAAAGGGGTTTCG        |
|                     | <i>trnG</i> -RT-forward           | GCGGGTATAGTTTAGTGG          |
|                     | <i>trnG</i> -RT-reverse           | GGTAGCGGGAATCGAAC           |
|                     | <i>trnL</i> -RT-forward           | GGGATATGGCGGAATTG           |
|                     | <i>trnL</i> -RT-reverse           | TGGGGATAGAGGGACTTG          |

|                                    |                                    |                                     |
|------------------------------------|------------------------------------|-------------------------------------|
| Poisoned primer extension analysis | PPE( <i>ndhA</i> )-reverse         | AACTGTACTTAAACTGTTAGAT(ddCTP)       |
|                                    | PPE( <i>clpP</i> Intron2)-reverse  | GCGGGTTGATGGATCATTACCC(ddCTP)       |
|                                    | PPE( <i>rps12</i> Intron1)-reverse | AGCAGAGTTTGGTTTTTGGGGG(ddCTP)       |
| Y2H assay                          | CAF1(AD:EcoRI)-forward             | GGAATTCCATATGGCCGAACGGTTCGAGCAGCG   |
|                                    | CAF1(AD:BamHI)-reverse             | CGCGGATCCTGCAAGTAGTTTAGCTAGTTC      |
|                                    | CAF2(AD:EcoRI)-forward             | GGAATTCTCCAATAGAAATCGTAATC          |
|                                    | CAF2(AD:BamHI)-reverse             | CGCGGATCCTTTTAGTCTTCCCTCAACTTC      |
|                                    | CFM2(AD:SmaI)-forward              | TCCCCCGGGTTGTAGTTCTGCTTCCGGTC       |
|                                    | CFM2(AD:BamHI)-reverse             | CGCGGATCCCAAACCACATTCAAGTCTTATGG    |
|                                    | CRS2(AD:EcoRI)-forward             | GGAATTCCATATGGCTTCGTTGCCTGTTTCTG    |
|                                    | CRS2(AD:BamHI)-reverse             | CGCGGATCCAACCTTTATGAAACTTGTATTCTGTC |
|                                    | SOT1(BD:NcoI)-forward              | CATGCCATGGAGTCCTTGAAACAACCTAAACC    |
|                                    | SOT1(BD:BamHI)-reverse             | CGCGGATCCTGCTTGAGAAGTAACTAAAGG      |
|                                    |                                    |                                     |
| Luciferase Complementation assays  | CAF1(CLuc:KpnI)-forward            | GGGGTACCATGTCGTTAAAACTCAACACTCC     |
|                                    | CAF1(CLuc:Sall)-reverse            | ACGCGTCGACTGCAAGTAGTTTAGCTAGTTCATC  |
|                                    | CAF2(CLuc:KpnI)-forward            | GGGGTACCATGGCGATTGTAGCATCACTAA      |
|                                    | CAF2(CLuc:Sall)-reverse            | ACGCGTCGACTTTTAGTCTTCCCTCAACTTCC    |
|                                    | CFM2(CLuc:KpnI)-forward            | GGGGTACCATGTTGCTTCCACTGTTTC         |
|                                    | CFM2(CLuc:Sall)-reverse            | ACGCGTCGACCAAACCACATTCAAGTCTTA TG   |
|                                    | CRS2(CLuc:KpnI)-forward            | GGGGTACCATGGTTACAGCGATGTTTTG        |
|                                    | CRS2(CLuc:Sall)-reverse            | ACGCGTCGACAACTTTATGAAACTTGTATTCTG   |
|                                    | CRS2(NE:KpnI)-reverse              | CGGGGTACCAACTTTATGAAACTTGTATTCTG    |
|                                    | SOT1(NLuc:KpnI)-forward            | GGGGTACCATGGCGACTGTTCTTACCAC        |
|                                    | SOT1(NLuc:Sall)-reverse            | ACGCGTCGACTGCTTGAGAAGTAACTAAAGG     |
|                                    |                                    |                                     |
| Co-IP assay                        | CAF1(pUC19:KpnI)-forward           | GGGGTACCATGTCGTTAAAACTCAACACTCC     |
|                                    | CAF1(pUC19:BstBI)-reverse          | ACTTCGAATGCAAGTAGTTTAGCTAGTTCATC    |



|      |                               |                                        |
|------|-------------------------------|----------------------------------------|
|      | CAF2(pUC19:KpnI)<br>-forward  | GGGGTACCATGGCGATTGTAGCATCAC            |
|      | CAF2(pUC19:BstBI)<br>-reverse | ACTTCGAATTTTAGTCTTCCCTCAACTTC<br>C     |
|      | YCF4(pUC19:KpnI)<br>-forward  | GGGGTACCATGAGTTGGCGATCAGAATC<br>TATATG |
|      | YCF4(pUC19:BstBI)<br>-reverse | GCTTCGAAAAATACTTCAATTGGTACAC<br>GC     |
|      | SOT1(pUC19:KpnI)<br>-forward  | GGGGTACCATGGCGACTGTTCTTACCAC           |
|      | SOT1(pUC19:Sall)<br>-reverse  | ACGCGTCGACTGCTTGAGAAGTAACTAA<br>AGG    |
| EMSA | probe P1-forward              | AGGAGATCAAAGCGGTTTT                    |
|      | probe P1-reverse              | TTTAACGATCAACTTCTCCC                   |
|      | probe P2-forward              | CTCGTGAACCTTAGCCGATAC                  |
|      | probe P2-reverse              | TGGAAAGATCTTATCAACGT                   |
|      | probe P3-forward              | CTGCCCAATCGATTAGTTAT                   |
|      | probe P3-reverse              | CCGTTTAACCTTTGTACATAGG                 |
|      | probe P4-forward              | CCTATGTACAAAGGTTAAACGG                 |
|      | probe P4-reverse              | CCTTTTCAATTTGGTTAATCTC                 |
|      | probe P5-forward              | GAGATTAACCAAATTGAAAAGG                 |
|      | probe P5-reverse              | CTTGTTTCGTTCTATTCTTC                   |
|      | probe P6-forward              | GAAGAATAGGAACGAAACAAG                  |
|      | probe P6-reverse              | CTGTCTGCTCAAATCTAAGA                   |
|      | probe P7-forward              | TCTTAGAATTTGAGCAGACAG                  |
|      | probe P7-reverse              | GCCTCAACTATATCAACTGTAC                 |
|      | RNA 12                        | Biotin-UGGCUGAUUUA                     |
